# Supplementary material for: Structure of human DPPA3 bound to the UHRF1 PHD finger reveals its functional and structural differences from mouse DPPA3
Source: PubMed Central journal article supplement (PMC11187062; doi:10.1038/s42003-024-06434-9), 2024-06-19
Supplement: 42003_2024_6434_MOESM2_ESM.pdf [file 42003_2024_6434_MOESM2_ESM.pdf]

## Supplementary Information

### **Structure of human DPPA3 bound to the UHRF1 PHD finger reveals its functional and structural differences from mouse DPPA3**

Nao Shiraishi, Tsuyoshi Konuma, Yoshie Chiba, Sayaka Hokazono, Nao Nakamura, Md Hadiul Islam, Makoto Nakanishi, Atsuya Nishiyama, Kyohei Arita

**a**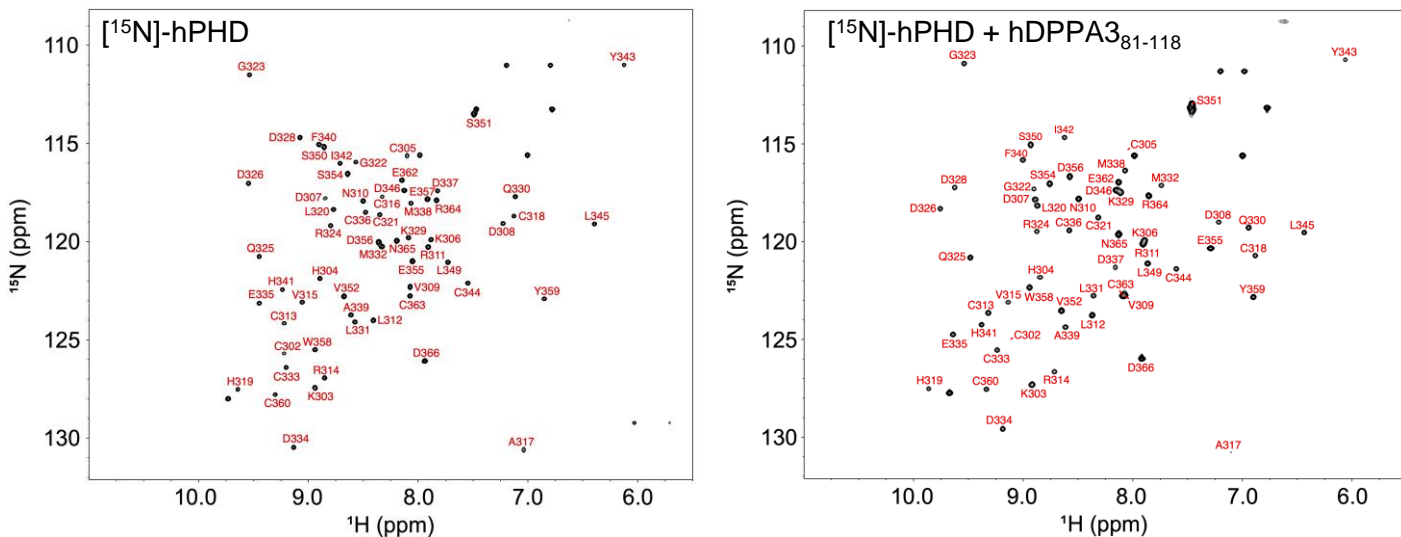**b**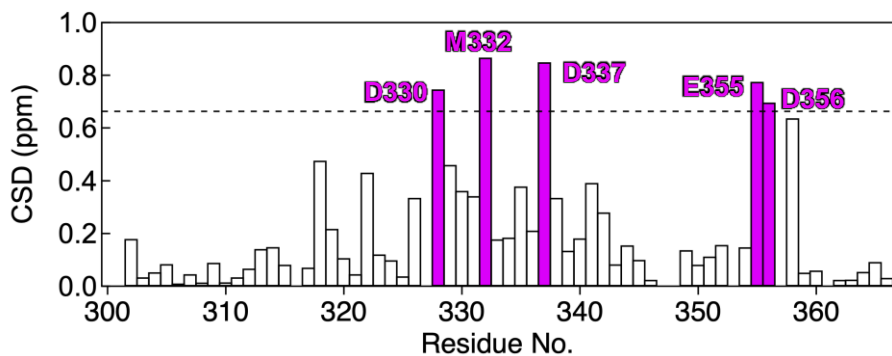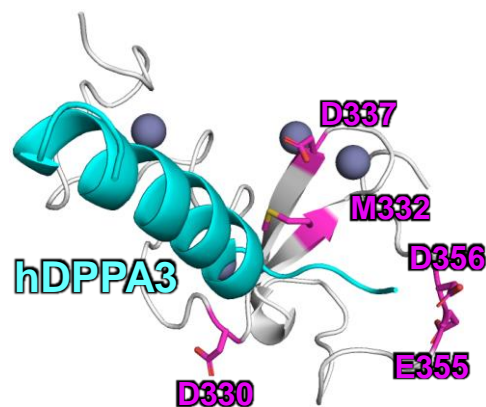

### Supplementary Figure 1: Nuclear magnetic resonance (NMR) titration experiments

(a) Signal assignments in the  $^1\text{H}$ - $^{15}\text{N}$  HSQC spectra of hPHD in the free state (left) and complex state with hDPPA3<sub>81-118</sub> (right). (b) Weighted average chemical shift differences in  $^1\text{H}$  and  $^{15}\text{N}$  resonances between free hPHD and hPHD in complex with hDPPA3<sub>81-118</sub> (left). The dashed line represents the mean plus 2 standard deviations. Mapping of D330, M332, D337, E355, and D356 in the crystal structure (right).

**a**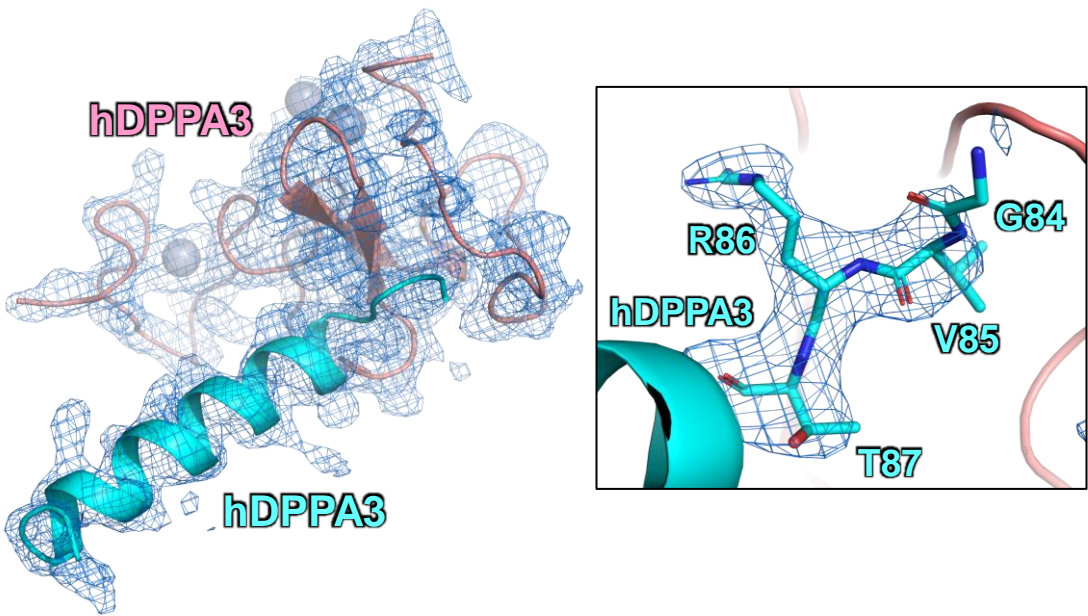**b**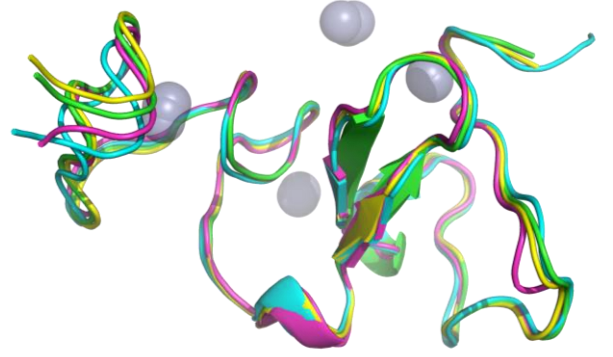

green: hPHD in the complex with hDPPA3  
 cyan: hPHD in the complex with histone H3  
 magenta: hPHD in the complex with PAF15  
 yellow: hPHD alone

**c**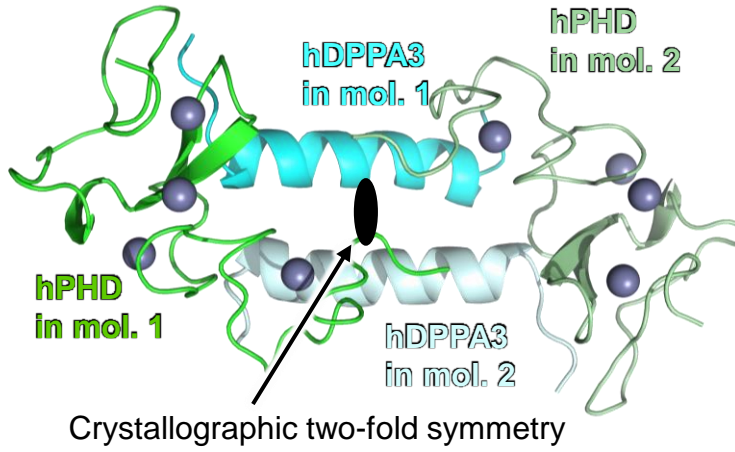

Crystallographic two-fold symmetry

**Supplementary Figure 2: Structural features of the hPHD:hDPPA3 complex in crystal form**

**(a)** Overlay of  $2|F_o|-|F_c|$  map countered at  $1.0 \sigma$  (blue mesh) on the cartoon model of the hPHD:hDPPA3<sub>81-118</sub> complex. The figure on the right shows a close-up view of the VRT motif of hDPPA3. The Omit map contoured at  $3 \sigma$  is shown as a blue mesh. **(b)** Structural comparison of the human UHRF1 PHD finger in the complex with hDPPA3 (green), histone H3 (cyan), and PAF15 (magenta) and of the structure of hPHD alone (yellow). **(c)** The hPHD:hDPPA3<sub>81-118</sub> complex forms a dimer with a crystallographic symmetry-related molecule via interaction with the  $\alpha$ -helix in hDPPA3. The crystallographic two-fold symmetry symbol is indicated.

**a**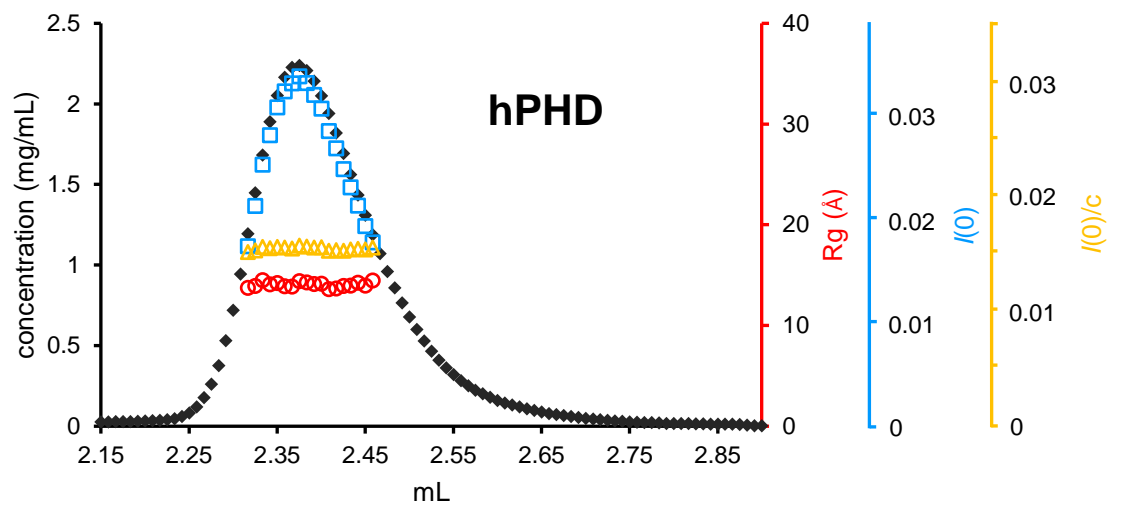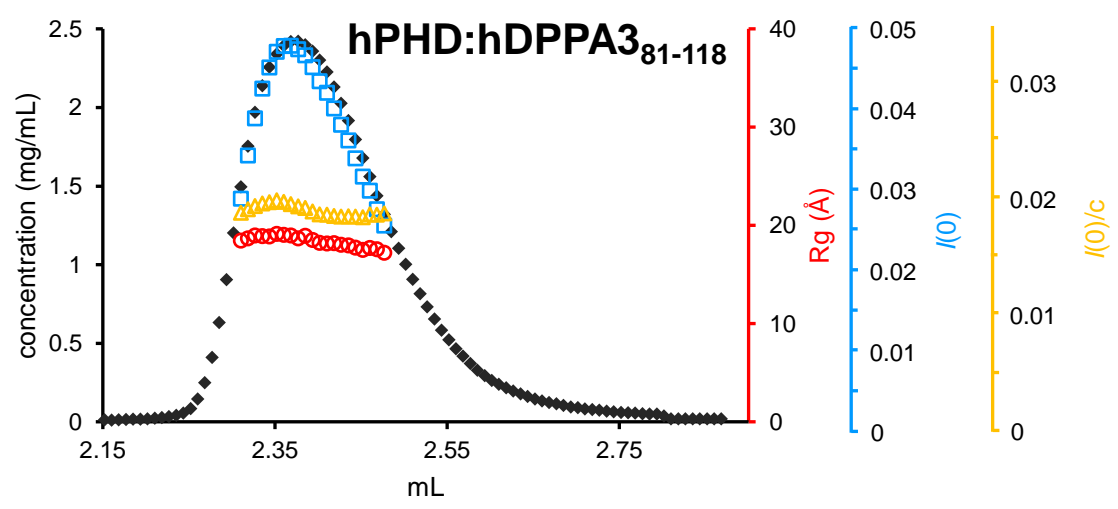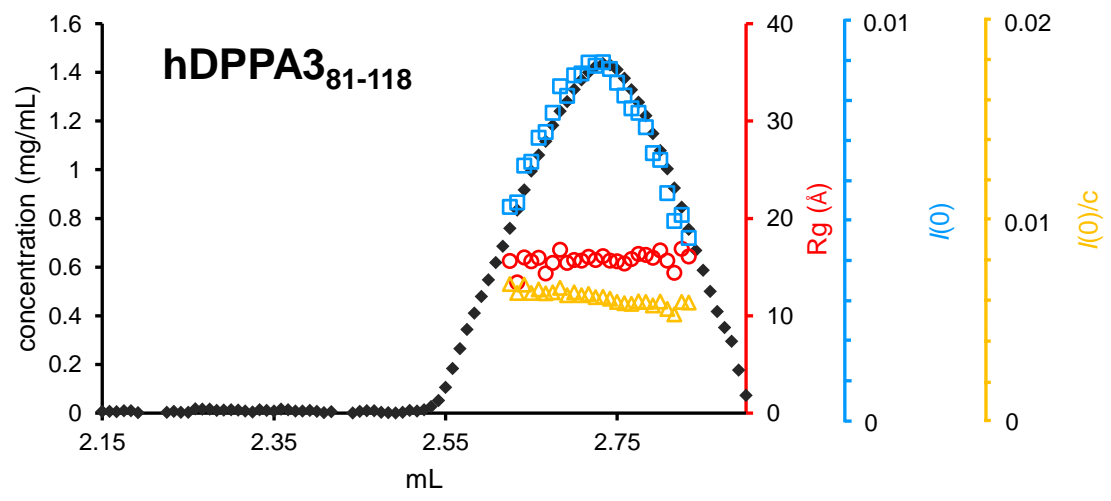

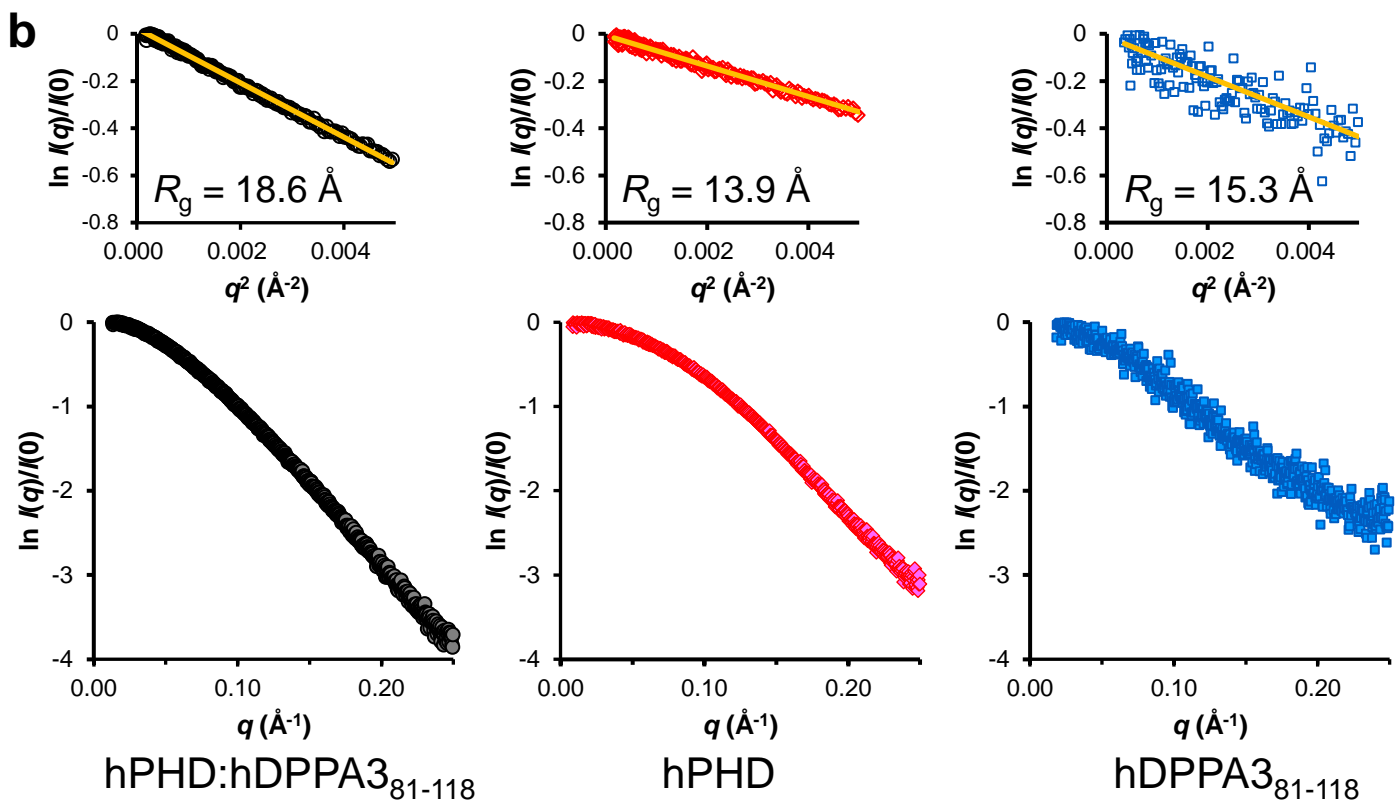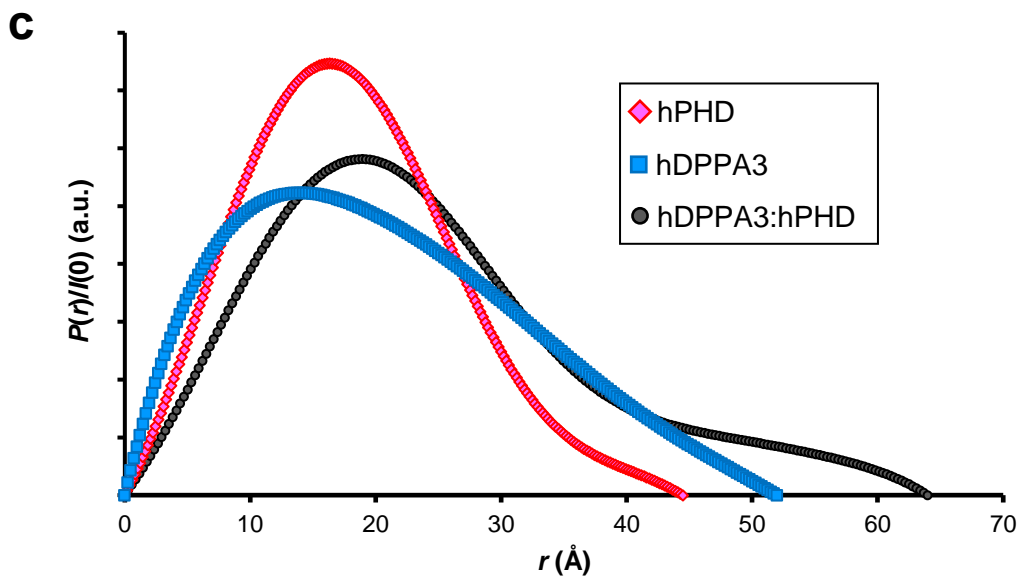

**Supplementary Figure 3: Size-exclusion chromatography–small-angle X-ray scattering (SEC-SAXS) data.**

(a) SEC-SAXS data of hPHD (top), hPHD:hDPPA3<sub>81-118</sub> complex (middle), and hDPPA3<sub>81-118</sub> (bottom). Absorption at 280 nm,  $I(0)$  calculated from the Guinier analysis,  $R_g$  values, and  $I(0)/c$  (concentration: mg/ml) are shown as black diamonds, cyan squares, red circles, and yellow triangles, respectively. (b) SAXS scattering intensity of the hPHD:hDPPA3<sub>81-118</sub> complex (left), hPHD (center), and hDPPA3<sub>81-118</sub> (right). The top panels indicate the Guinier plot with  $qR_g < 1.3$  shown as an orange line.  $R_g$  values are shown in the graphs. (c) Overlay of the distance distribution function,  $P(r)$ , of hPHD:hDPPA3<sub>81-118</sub> complex (black), hPHD (pink), and hDPPA3<sub>81-118</sub> (cyan).

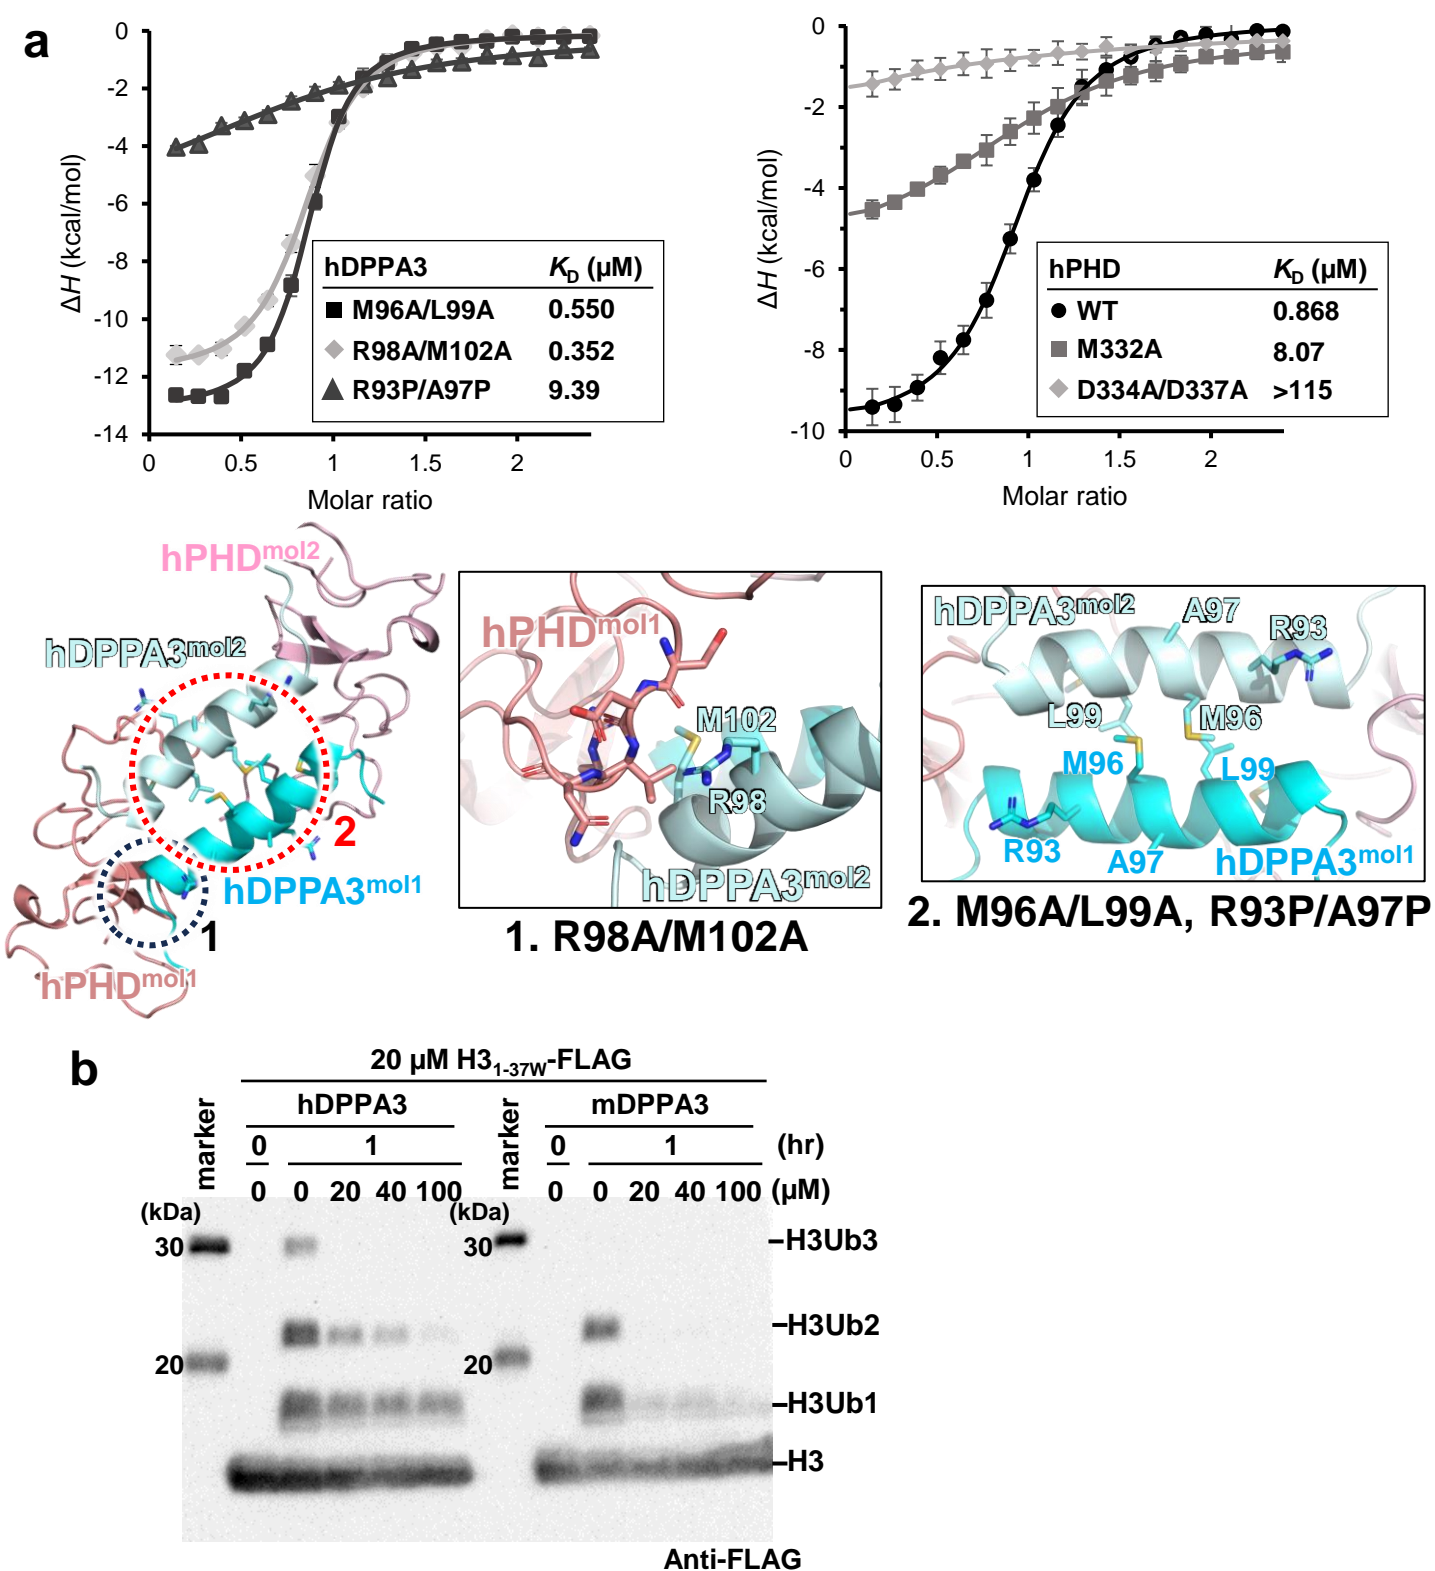

**Supplementary Figure 4: Biochemical assays.**

**(a)** Isothermal titration calorimetry (ITC) measurements for mutants of hDPPA3<sub>81-118</sub> and hPHD. Superimposition of enthalpy change plots with standard deviations. Data are presented as the mean  $\pm$  SD for  $n = 3$ . The bottom figures represent the mutated residues (stick model) at the dimer interface in the crystal. **(b)** An *in vitro* ubiquitination assay to compare the inhibitory effects of hDPPA3 and mDPPA3. The gel image is representative of  $n = 3$  independent experiments.

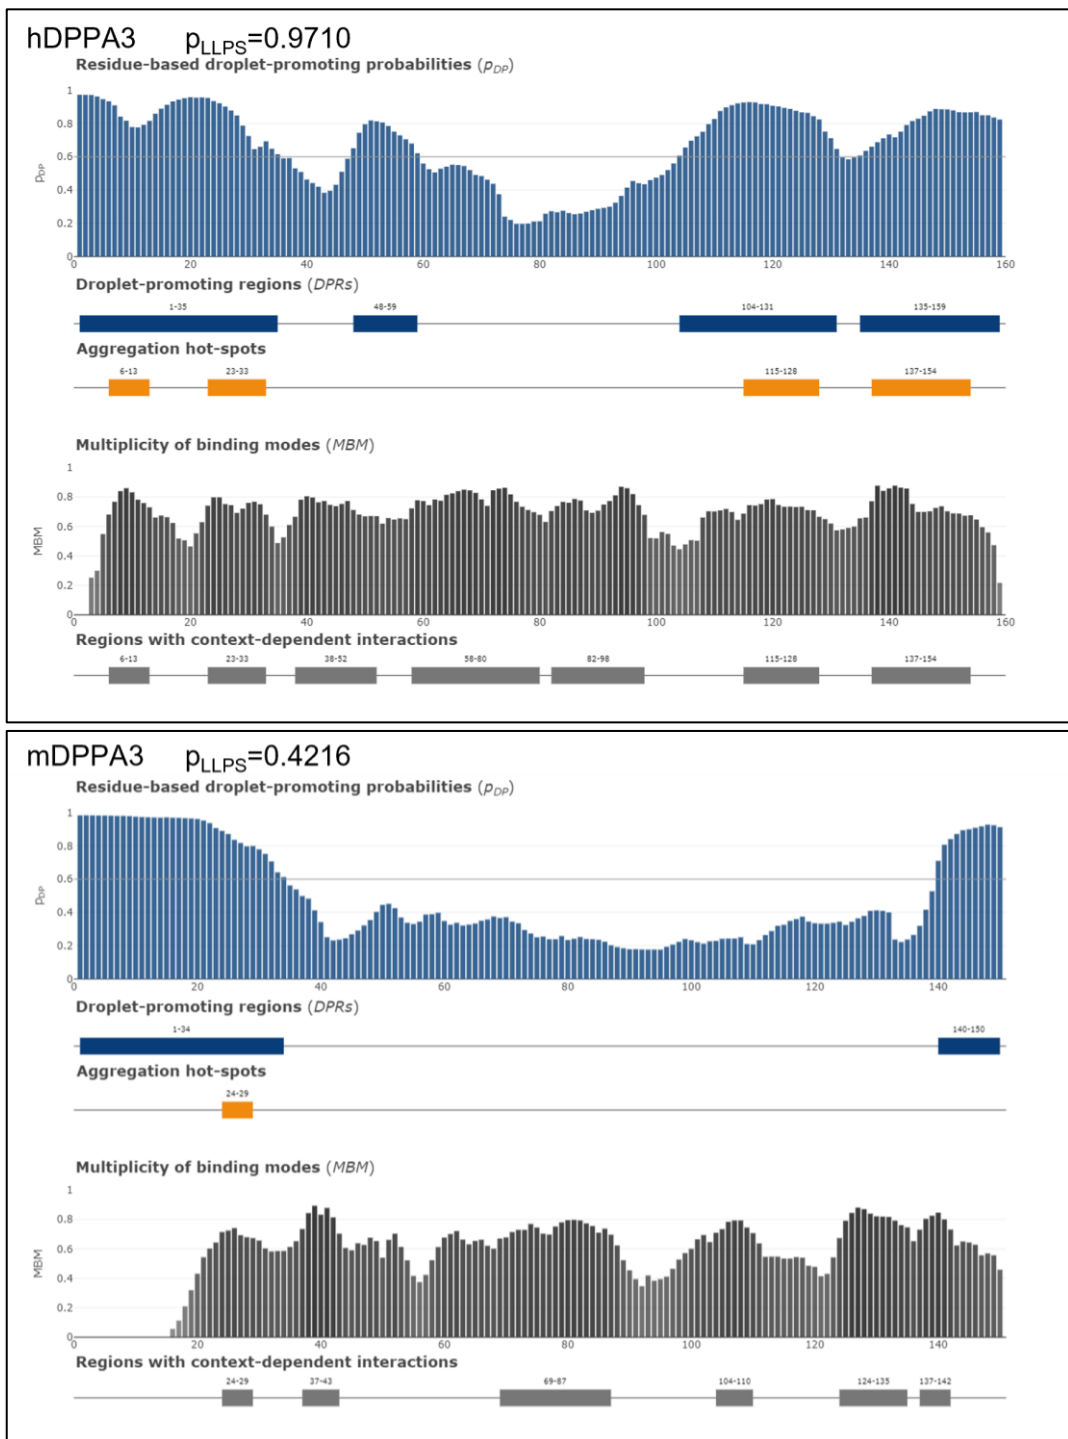

**Supplementary Figure 5: Prediction of droplet formation in human (upper panel) and mouse DPPA3 (lower panel).**

PLLPS is the probability of forming a droplet state through liquid-liquid phase separation. PLLPS  $\geq 0.60$  are assigned as droplet-drivers.



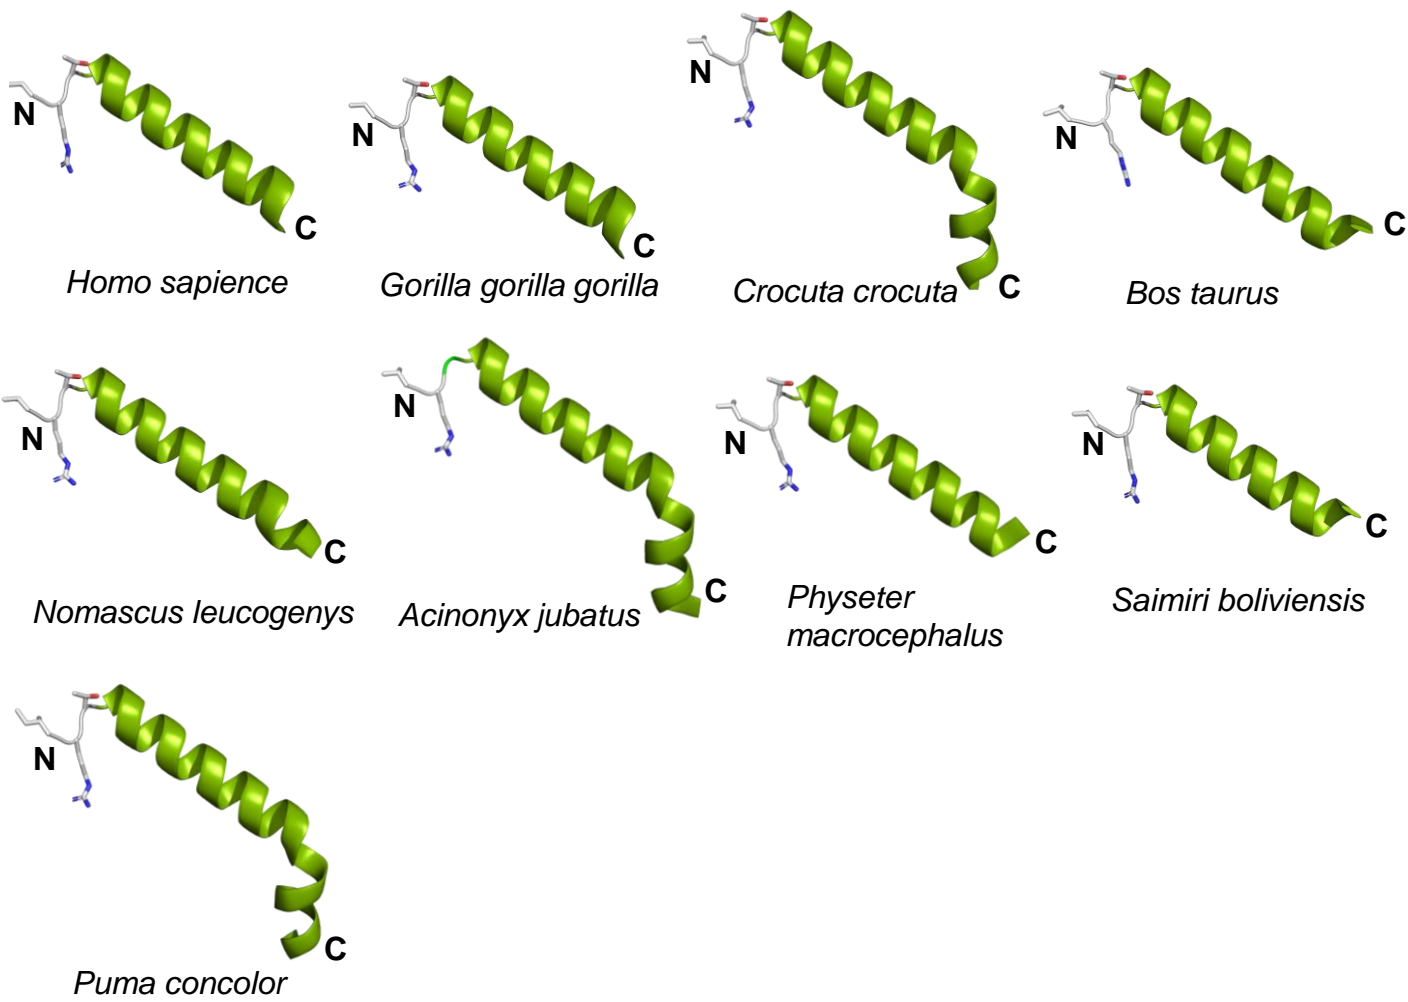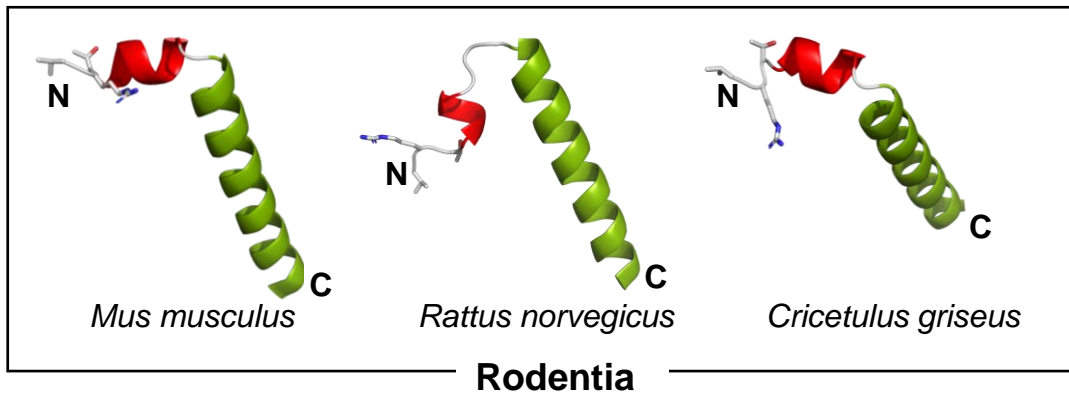

**Supplementary Figure 6: AlphaFold 2 structural prediction of DPPA3 in various species.**

The VRT motif and the following  $\alpha$ -helix of DPPA3, predicted by AlphaFold2, are displayed. White sticks indicate side chains of the conserved VRT motif.  $\alpha$ -Helices are shown as cartoon models, in which the long  $\alpha$ -helix is colored green and the short  $\alpha$ -helix, unique to Rodentia, is displayed in red.



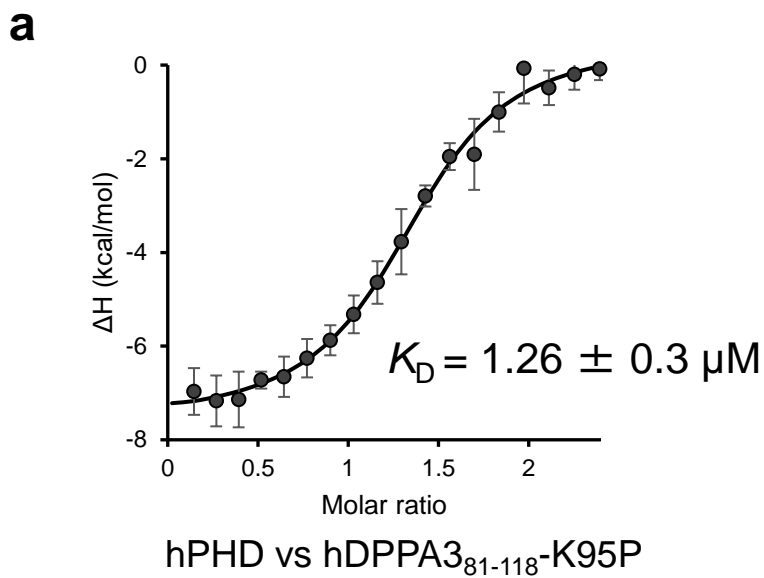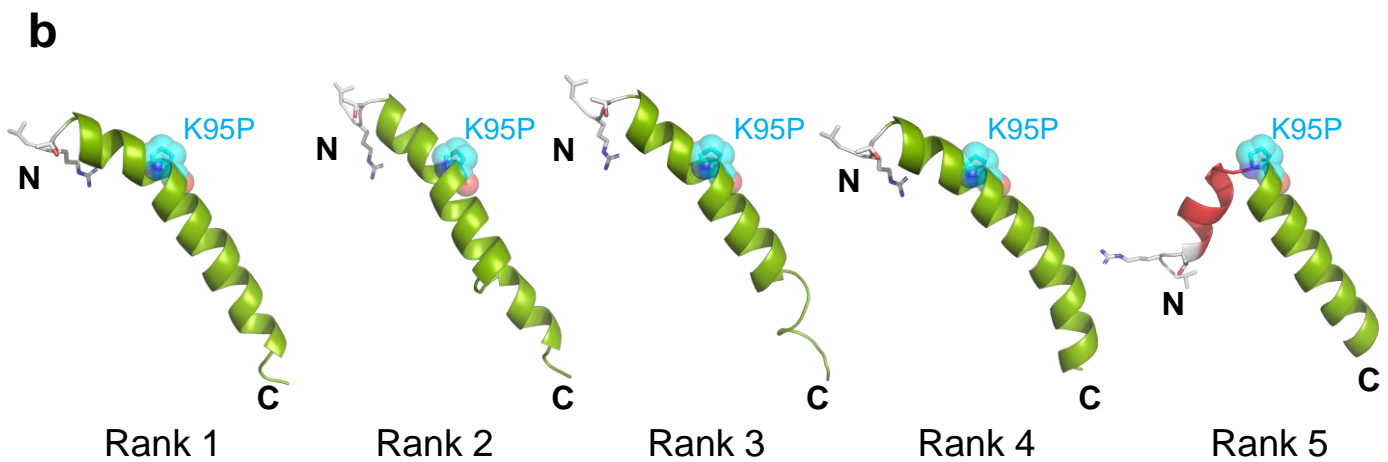

**Supplementary Figure 7: Analysis of K95P mutant of hDPPA3.**

**(a)** ITC measurements of the K95P mutant hDPPA3<sub>81-118</sub> and WT hPHD. Superimposition of enthalpy change plots with standard deviations. Data are presented as mean  $\pm$  SD for  $n = 3$ .

**(b)** AlphaFold2 structure prediction of K95P mutant of hDPPA3<sub>81-118</sub>. K95P is shown as a cyan stick superimposed on a transparent sphere. The VRT motif is depicted as a stick model.

**Supplementary Table 1****Sample details**

| Sample name                                 | hPHD                                                                                    | hPHD:hDPPA3                                                      | hDPPA3                         |
|---------------------------------------------|-----------------------------------------------------------------------------------------|------------------------------------------------------------------|--------------------------------|
| Organism                                    | <i>Homo sapiens sapiens</i>                                                             |                                                                  |                                |
| UniProt sequence ID                         | Q96T88 (UHRF1)                                                                          | Q96T88 (UHRF1)<br>Q6W0C5 (DPPA3)                                 | Q6W0C5 (DPPA3)                 |
| Extinction coefficient $\epsilon$           | 8480                                                                                    | 9970                                                             | 1490                           |
| Calculated monomeric Mr from sequence (kDa) | 7.8 (PHD <sub>299-366</sub> )                                                           | [7.8 (PHD <sub>299-366</sub> ) + 4.4 (DPPA3 <sub>81-117</sub> )] | 4.4 (DPPA3 <sub>81-117</sub> ) |
| HPLC system                                 | Nexera/Prominence-I (Shimadzu)                                                          |                                                                  |                                |
| SEC Column                                  | Superdex™ 200 Increase 5/150 GL                                                         |                                                                  |                                |
| Temperature (K)                             | 293                                                                                     |                                                                  |                                |
| Injection volume ( $\mu$ L)                 | 50                                                                                      |                                                                  |                                |
| Loading concentration (mg/mL)               | 12                                                                                      |                                                                  |                                |
| Flow rate (mL/min)                          | 0.025                                                                                   |                                                                  |                                |
| SEC buffer                                  | 20 mM Tris-HCl (pH 7.5), 150 mM NaCl, 2 mM DTT, 10 $\mu$ M Zinc acetate and 5% glycerol |                                                                  |                                |

**Data-collection parameters**

|                                  |                                               |                 |             |
|----------------------------------|-----------------------------------------------|-----------------|-------------|
| Beamline                         | Photon Factory BL-10C                         |                 |             |
| Detector                         | Pilatus3 2 M                                  |                 |             |
| Sample-to-detector distance (mm) | 2,082                                         |                 |             |
| Wavelength ( $\text{\AA}$ )      | 1.5                                           |                 |             |
| $q$ range ( $\text{\AA}^{-1}$ )  | 0.0083 - 0.264                                | 0.00865 - 0.264 | 0.018-0.264 |
| Exposure time (s)                | 20/frame                                      |                 |             |
| Flux (photons/s)                 | $1.1 \times 10^{11}$                          |                 |             |
| Beam size                        | 0.63 mm (H) $\times$ 0.18 mm (V)              |                 |             |
| Concentration range (mg/mL)      | 1.17 - 2.18                                   | 1.3 - 2.46      | 0.739-1.44  |
| Absolute scaling method          | Using the scattering intensity of water       |                 |             |
| Normalization                    | To transmitted intensity by beam-stop counter |                 |             |

**Structural parameters**

| <b>Guinier analysis</b>                                |                                |                                |                                 |
|--------------------------------------------------------|--------------------------------|--------------------------------|---------------------------------|
| $I(0)$ ( $\text{cm}^{-1}$ )                            | $0.015 \pm 1.8 \text{ E}^{-5}$ | $0.019 \pm 2.2 \text{ E}^{-5}$ | $0.0057 \pm 9.0 \text{ E}^{-5}$ |
| $R_g$ ( $\text{\AA}$ )                                 | $13.9 \pm 0.03 \text{ \AA}$    | $18.6 \pm 0.04 \text{ \AA}$    | $15.3 \pm 0.43 \text{ \AA}$     |
| $q$ -range ( $\text{\AA}^{-1}$ ), point range          | 0.18-1.30, 14-248              | 0.20-1.30, 7-179               | 0.30-1.30, 3-186                |
| <b>P(r) analysis</b>                                   |                                |                                |                                 |
| $I(0)$ ( $\text{cm}^{-1}$ )                            | $0.015 \pm 8.6 \text{ E}^{-5}$ | $0.019 \pm 1.2 \text{ E}^{-4}$ | $0.0058 \pm 1.1 \text{ E}^{-4}$ |
| $R_g$ ( $\text{\AA}$ )                                 | $14.0 \pm 0.11 \text{ \AA}$    | $19.1 \pm 0.19 \text{ \AA}$    | $16.5 \pm 0.32 \text{ \AA}$     |
| $D_{\text{max}}$ ( $\text{\AA}$ )                      | 44.5                           | 64.0                           | 52.0                            |
| $q$ -range ( $\text{\AA}^{-1}$ ), point range          | 0.0128-0.2642, 14-742          | 0.0100-0.2156, 5-600           | 0.0211-0.2642, 10-714           |
| Porod volume estimate ( $\text{\AA}^3$ )               | 16393                          | 16873                          | 13315                           |
| Dry volume calculated from sequence ( $\text{\AA}^3$ ) | 9381                           | 14711                          | 5352                            |
| Partial specific volume ( $\text{cm}^3\text{g}^{-1}$ ) | 0.743                          | 0.743                          | 0.743                           |
| Molecular mass Mr [from $V_c$ ] (kDa)                  | 9.0                            | 13.0                           | 7.9                             |
| Calculated monomeric Mr from sequence (kDa)            | 7.8                            | 12.2                           | 4.4                             |

**Software employed**

|                                  |                           |
|----------------------------------|---------------------------|
| Primary data reduction           | Sangler 2.1.39            |
| Guinier Analysis                 | AutoGuinier (ATSAS 3.1.3) |
| Zero-concentration Extrapolation | MOLASS 1.0.10             |
| Data processing                  | PRIMUS                    |
