# Supplementary material for: Structure of human DPPA3 bound to the UHRF1 PHD finger reveals its functional and structural differences from mouse DPPA3
Source: PubMed Central journal article supplement (PMC11187062; doi:10.1038/s42003-024-06434-9), 2024-06-19
Supplement: 42003_2024_6434_MOESM7_ESM.pdf [file 42003_2024_6434_MOESM7_ESM.pdf]

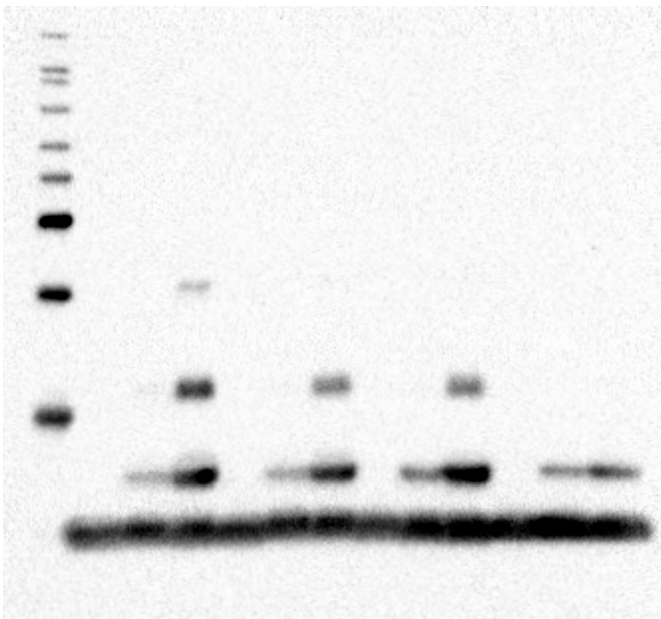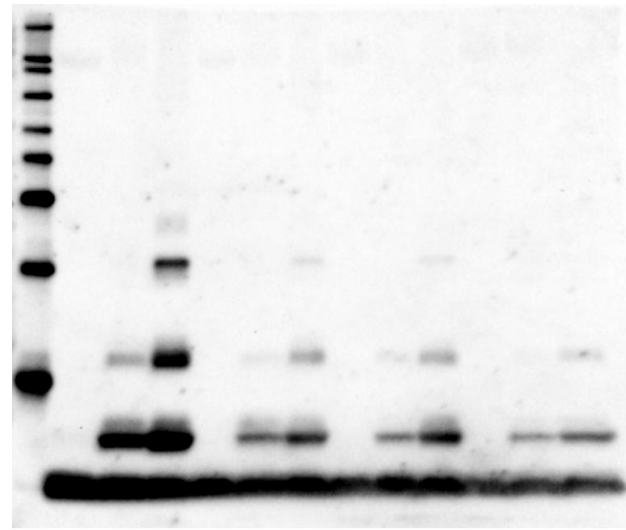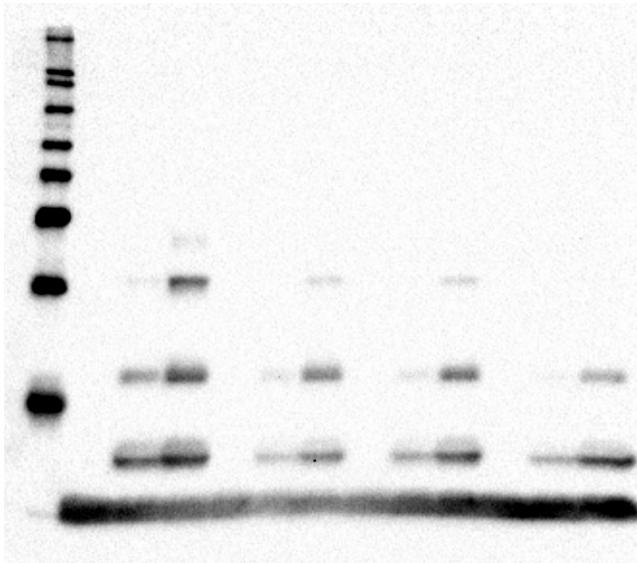

Uncropped blot images related to the top panel of Figure 4b.

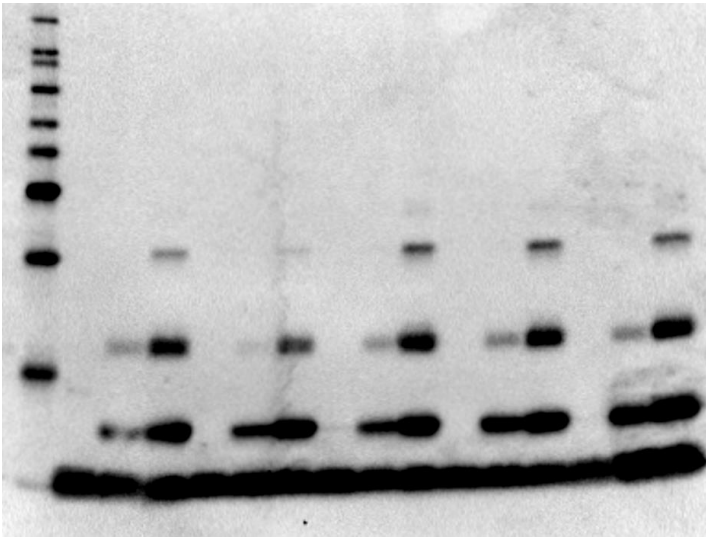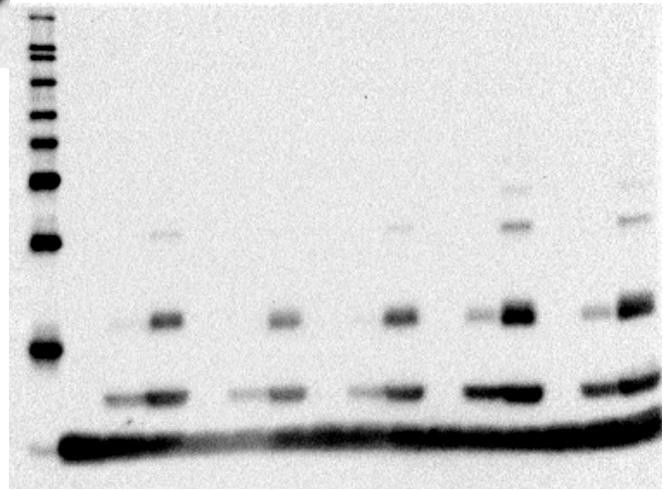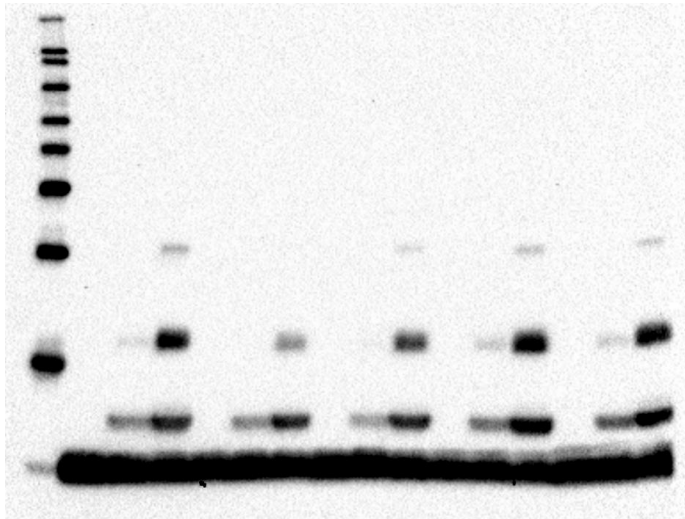

Uncropped blot images related to the bottom panel of Figure 4b.

C

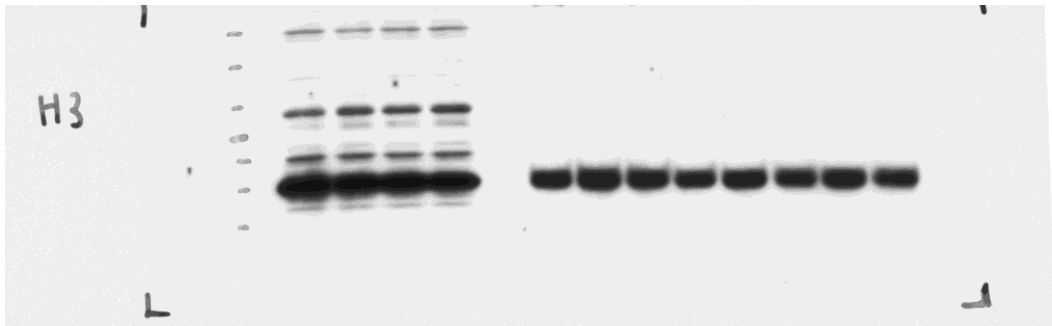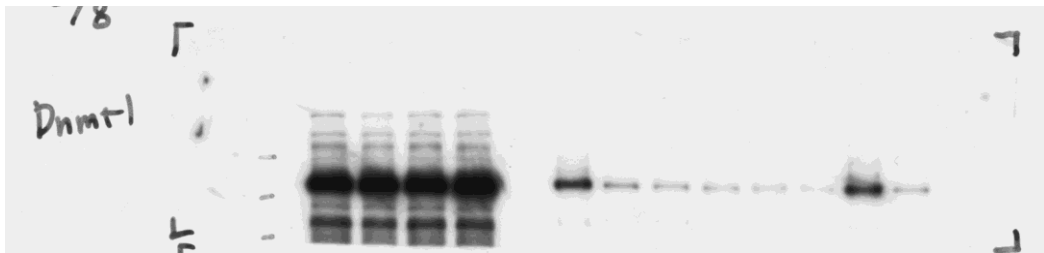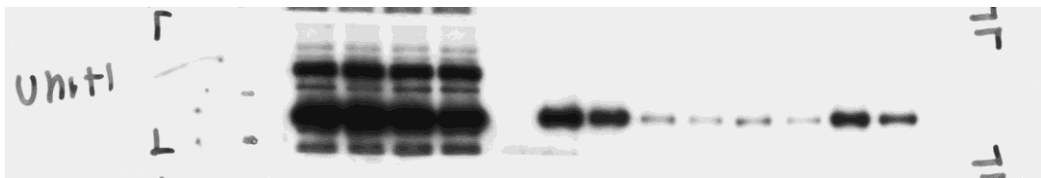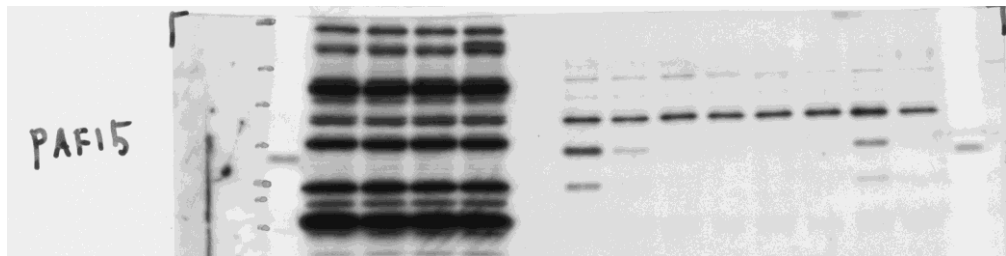

Uncropped blot images related to Figure 5b.

d

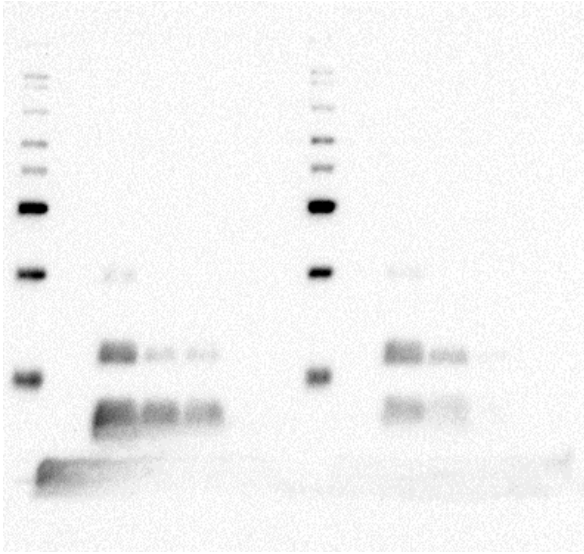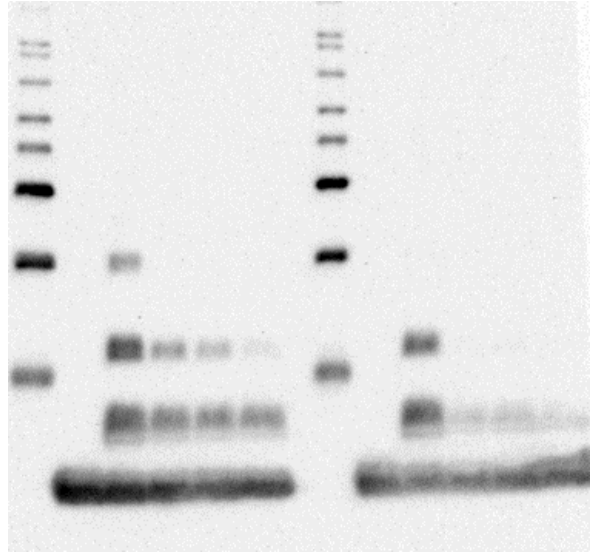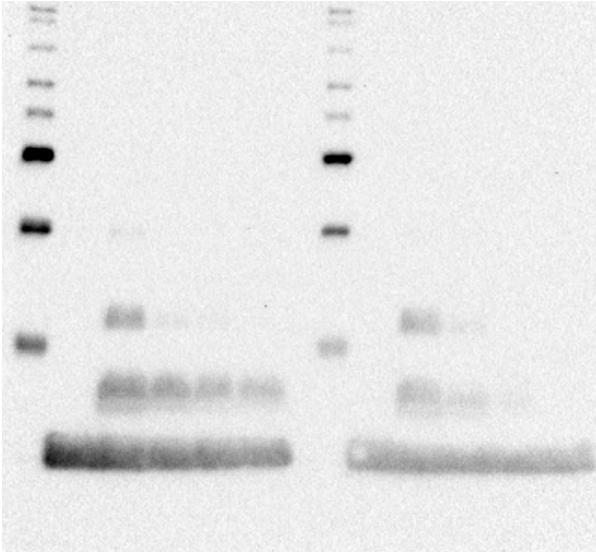

Uncropped blot images related to Supplementary Figure 4b.
